# Supplementary material for: Ruthenium-doped cobalt sulphide electrocatalyst derived from a ruthenium–cobalt Prussian blue analogue (RuCo-PBA) for an enhanced hydrogen evolution reaction (HER)
Source: Royal Society of Chemistry journal article supplement (doi:10.1039/d4dt00099d), 2024-01-01
Supplement: d4dt00099d1.pdf [file d4dt00099d1.pdf]

## Supporting Information

### **Ruthenium doped cobalt sulphide electrocatalyst derived from ruthenium-cobalt Prussian blue analogue (RuCo-PBA) for enhanced hydrogen evolution reaction (HER)**

Manisha Sadangi,<sup>a, b</sup> and J. N. Behera<sup>a, b\*</sup>

<sup>a</sup> School of Chemical Sciences, National Institute of Science Education and Research (NISER), An OCC of Homi Bhabha National Institute (HBNI), Khurdha, 752050, Odisha, India

<sup>b</sup> Centre for Interdisciplinary Sciences (CIS), NISER, 752050, Jatni, Odisha, India

E-mail: [jnbehera@niser.ac.in](mailto:jnbehera@niser.ac.in)

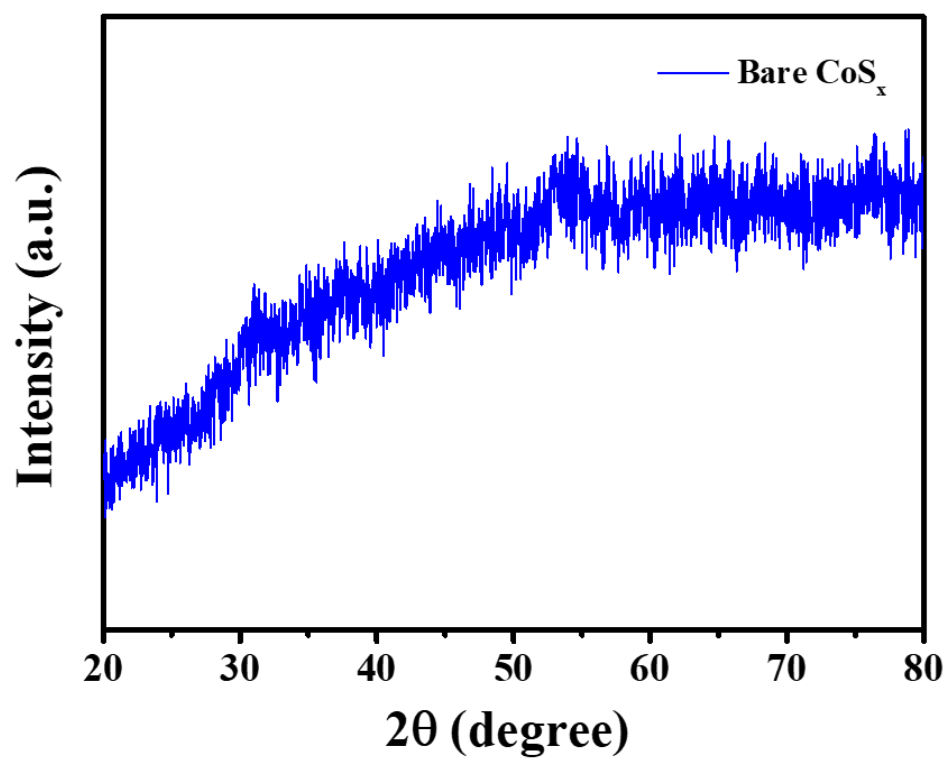

Fig. S1: Powder X-ray diffraction study of bare CoS<sub>x</sub>.

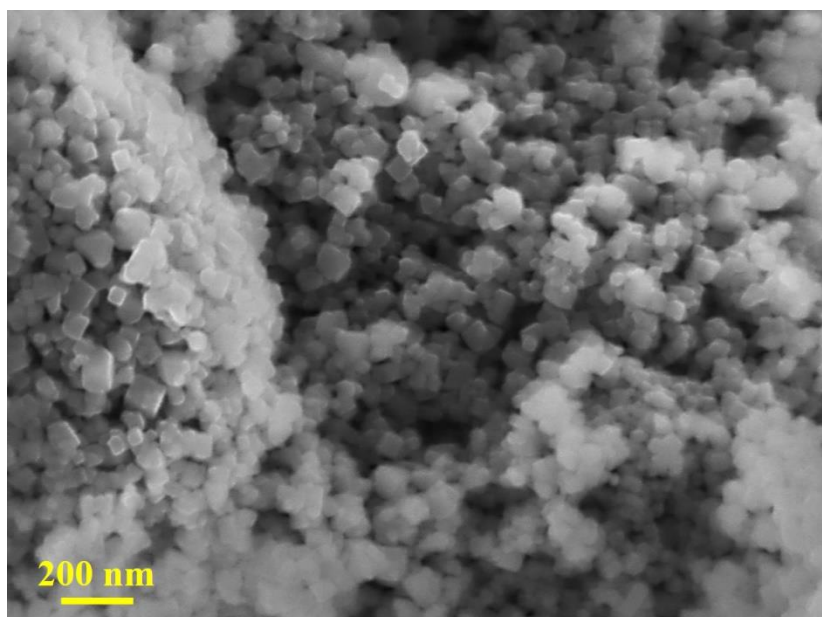

Fig. S2: FESEM image of RuCo-PBA.

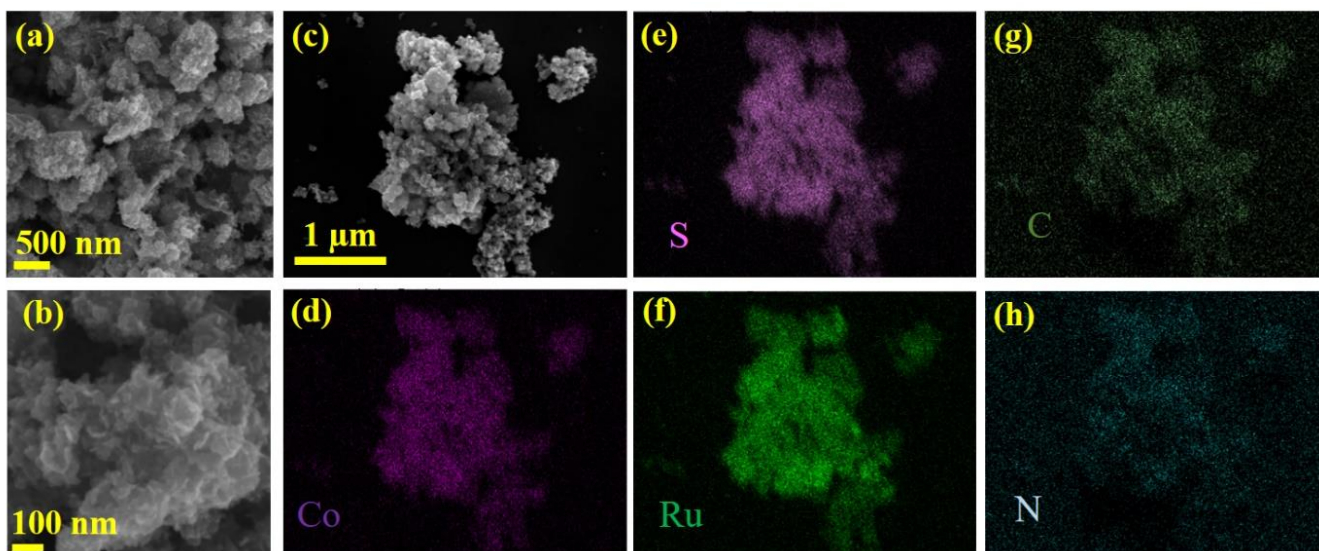

Fig. S3: FESEM images of  $\text{Co}_9\text{S}_8/\text{Ru}@24\text{H}$  at different scales (a-c) and elemental mapping of  $\text{Co}_9\text{S}_8/\text{Ru}@24\text{H}$  (d-h).

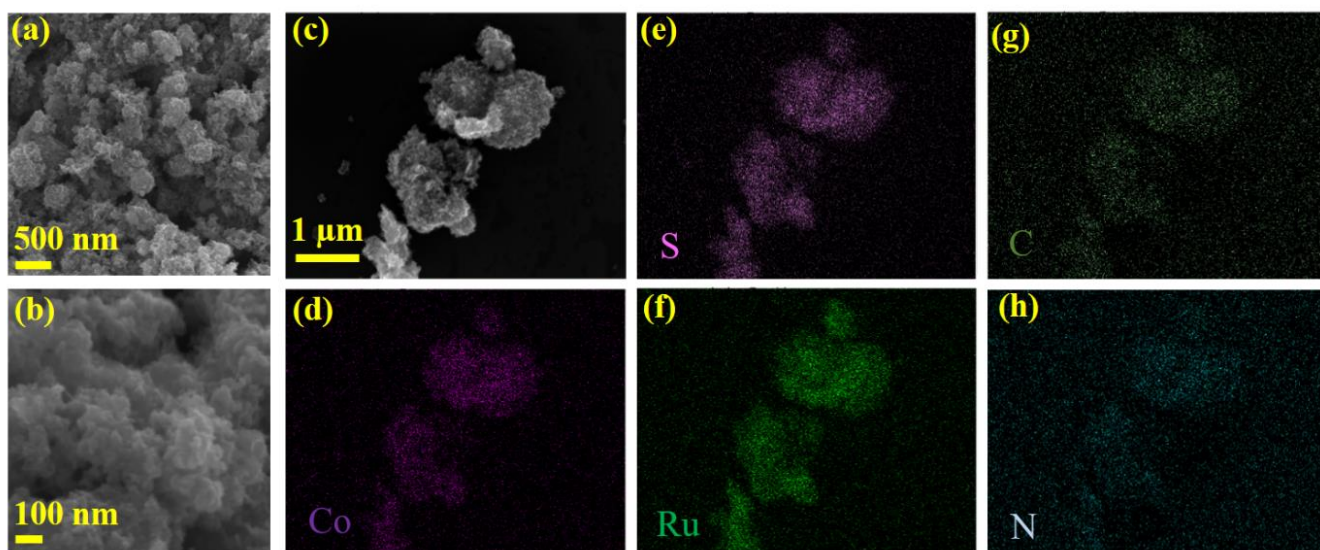

Fig. S4: FESEM images of  $\text{Co}_9\text{S}_8/\text{Ru}@72\text{H}$  at different scales (a-c) and elemental mapping of  $\text{Co}_9\text{S}_8/\text{Ru}@72\text{H}$  (d-h).

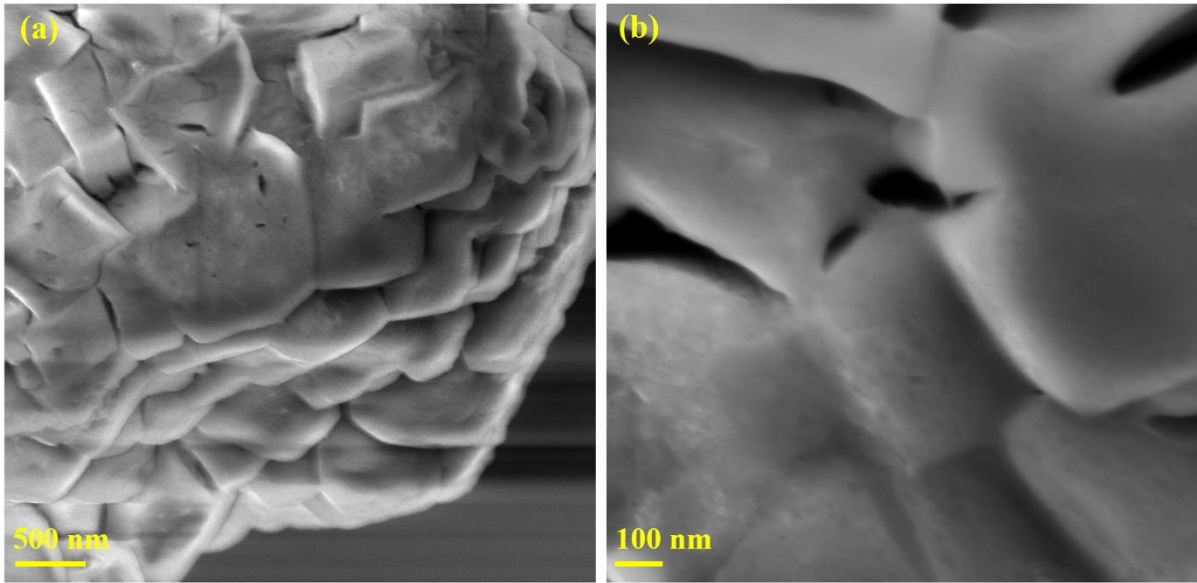

Fig. S5: FESEM images of  $\text{CoS}_x$  at different scales (a & b).

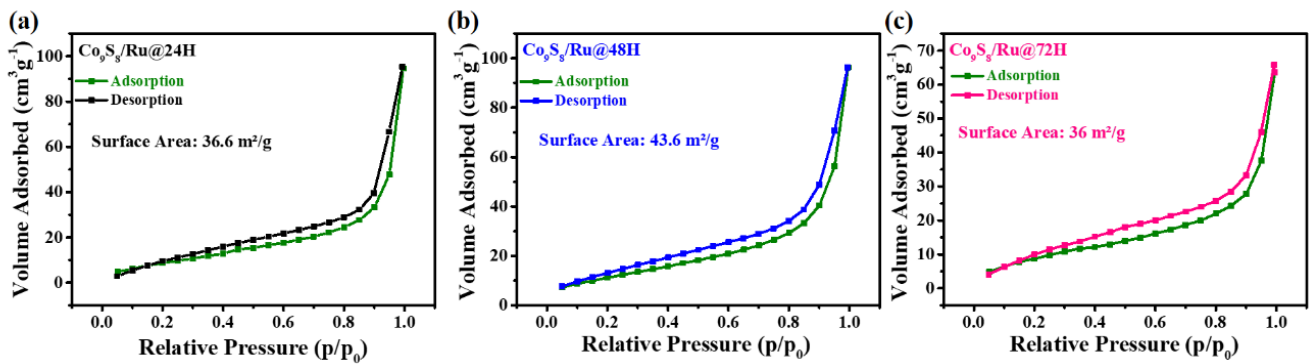

Fig. S6: Nitrogen adsorption-desorption isotherm for  $\text{Co}_9\text{S}_8/\text{Ru}@24\text{H}$  (a),  $\text{Co}_9\text{S}_8/\text{Ru}@48\text{H}$  (b) and  $\text{Co}_9\text{S}_8/\text{Ru}@72\text{H}$  (c).

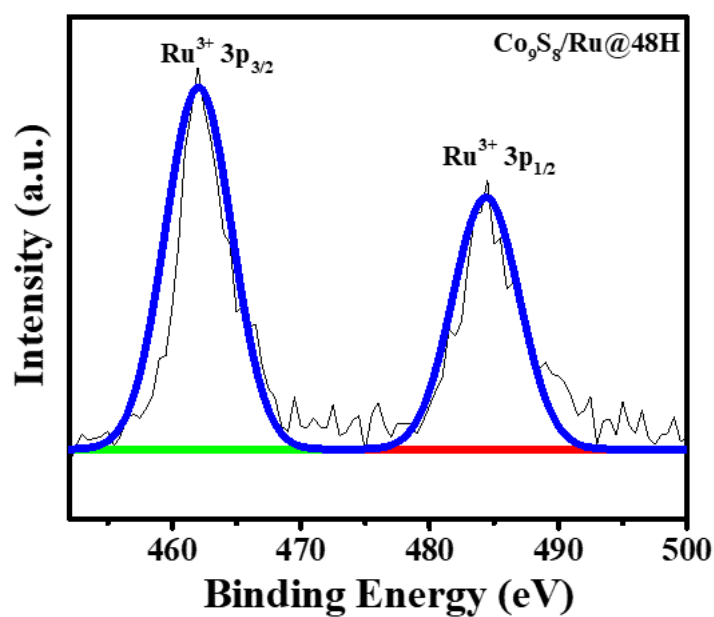

Fig. S7: XPS spectrum of Ru 3p in  $\text{Co}_9\text{S}_8/\text{Ru}@48\text{H}$ .

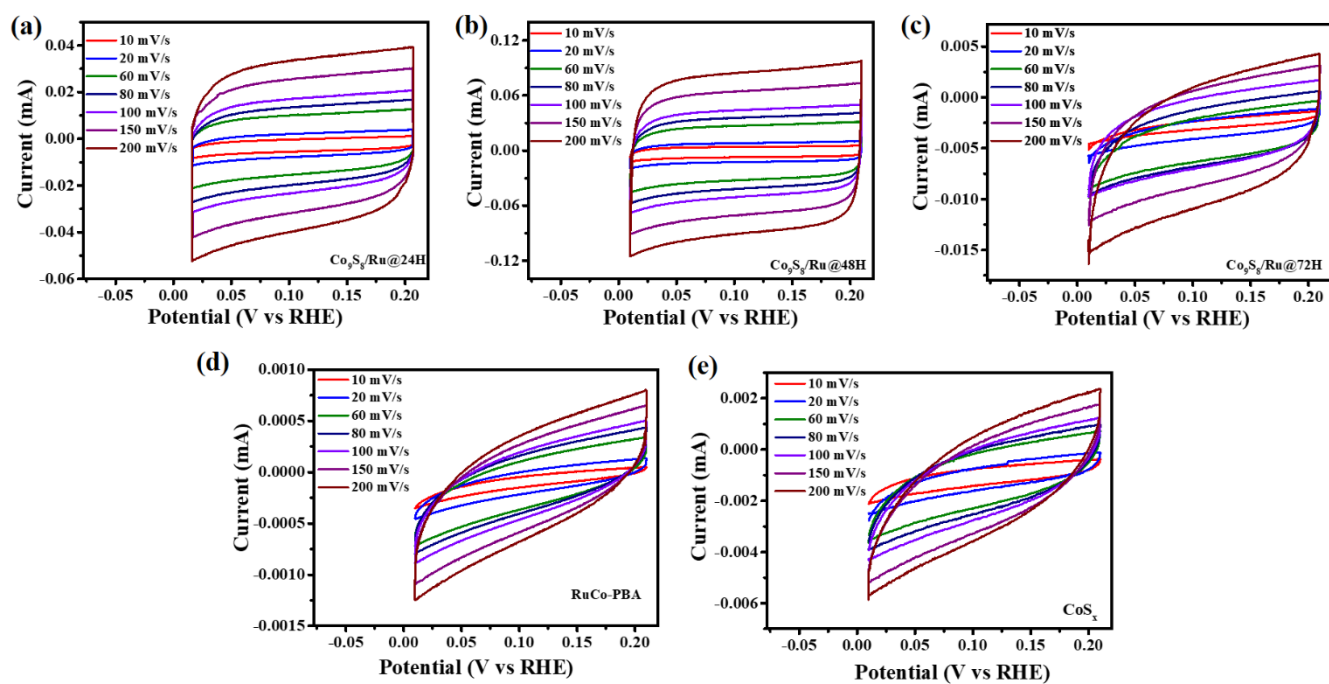

Fig. S8: Cyclic voltammograms (CVs) of  $\text{Co}_9\text{S}_8/\text{Ru}@24\text{H}$  (a),  $\text{Co}_9\text{S}_8/\text{Ru}@48\text{H}$  (b),  $\text{Co}_9\text{S}_8/\text{Ru}@72\text{H}$  (c), RuCo-PBA (d) and bare  $\text{CoS}_x$  (e).

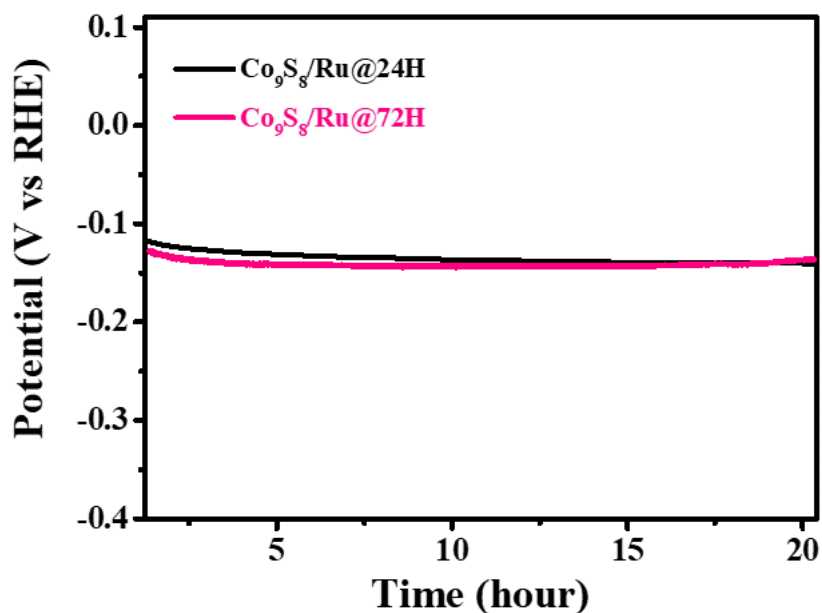

Fig. S9: Chronopotentiometry test of Co<sub>9</sub>S<sub>8</sub>/Ru@24H and Co<sub>9</sub>S<sub>8</sub>/Ru@72H in 0.5 M H<sub>2</sub>SO<sub>4</sub> acidic solution.

Table S1: Comparison of metal sulphide-based electrocatalysts for HER.

|                                                             | Overpotential at<br>10 mA cm <sup>-2</sup><br>(mV) | Tafel slope<br>(mV dec <sup>-1</sup> ) | Electrolyte                          | References |
|-------------------------------------------------------------|----------------------------------------------------|----------------------------------------|--------------------------------------|------------|
| Co <sub>9</sub> S <sub>8</sub> -30@MoS <sub>x</sub> /CC     | 98                                                 | 64.8                                   | 0.5 M H <sub>2</sub> SO <sub>4</sub> | 1          |
| Co <sub>9</sub> S <sub>8</sub> -NDCL                        | 149@20mA cm <sup>-2</sup>                          | 70                                     | 0.5 M H <sub>2</sub> SO <sub>4</sub> | 2          |
| Co <sub>9</sub> S <sub>8</sub> /NC@MoS <sub>2</sub>         | 117                                                | 68.8                                   | 0.5 M H <sub>2</sub> SO <sub>4</sub> | 3          |
| MoS <sub>2</sub> /Co <sub>9</sub> S <sub>8</sub> /MoC@CNT-N | 174.2                                              | 84.7                                   | 0.5 M H <sub>2</sub> SO <sub>4</sub> | 4          |
| CoS <sub>2</sub> nanowires                                  | 145                                                | 51.6                                   | 0.5 M H <sub>2</sub> SO <sub>4</sub> | 5          |
| Co <sub>x</sub> S <sub>y</sub>                              | 188                                                | 96                                     | 0.5 M H <sub>2</sub> SO <sub>4</sub> | 6          |
| Co <sub>9</sub> S <sub>8</sub> @MoS <sub>2</sub>            | 106                                                | 51.8                                   | 0.5 M H <sub>2</sub> SO <sub>4</sub> | 7          |
| Zn-Co <sub>9</sub> S <sub>8</sub> @CF-(1-1)                 | 278                                                | 85.2                                   | 0.5 M H <sub>2</sub> SO <sub>4</sub> | 8          |
| Co <sub>9</sub> S <sub>8</sub> /Ru@48H                      | 94                                                 | 84                                     | 0.5 M H <sub>2</sub> SO <sub>4</sub> | This work  |

## References:

- 1 X. Zhou, X. Yang, M. N. Hedhili, H. Li, S. Min, J. Ming, K. W. Huang, W. Zhang and L. J. Li, *Nano Energy*, 2017, **32**, 470–478.
- 2 J. Mujtaba, L. He, H. Zhu, Z. Xiao, G. Huang, A. A. Solovev and Y. Mei, *ACS Appl. Nano Mater.*, 2021, **4**, 1776–1785.
- 3 H. Li, X. Qian, C. Xu, S. Huang, C. Zhu, X. Jiang, L. Shao and L. Hou, *ACS Appl. Mater. Interfaces*, 2017, **9**, 28394–28405.
- 4 M. Wang, K. Jian, Z. Lv, D. Li, G. Fan, R. Zhang and J. Dang, *J. Mater. Sci. Technol.*, 2021, **79**, 29–34.
- 5 M. S. Faber, R. Dziedzic, M. A. Lukowski, N. S. Kaiser, Q. Ding and S. Jin, *J. Am. Chem. Soc.*, 2014, **136**, 10053–10061.
- 6 X. Sun, H. Huang, C. Wang, Y. Liu, T. L. Hu and X. H. Bu, *ChemElectroChem*, 2018, **5**, 3639–3644.
- 7 V. Ganesan, S. Lim and J. Kim, *Chem. Asian J.*, 2018, **13**, 413–420.
- 8 B. Dong, J. Y. Xie, N. Wang, W. K. Gao, Y. Ma, T. S. Chen, X. T. Yan, Q. Z. Li, Y. L. Zhou and Y. M. Chai, *Renew. Energy*, 2020, **157**, 415–423.
